# Supplementary material for: Li intercalation in 2D iron phosphate synthesized from the partial dehydration and deprotonation of vivianite
Source: Royal Society of Chemistry journal article supplement (doi:10.1039/d3cp02463f), 2023-01-01
Supplement: d3cp02463f1.pdf [file d3cp02463f1.pdf]

**Supplementary material for  
Li intercalation in 2D iron phosphate synthesized from the partial  
dehydration and deprotonation of vivianite**

Ryo Yamane,<sup>\*a</sup> Hongyi Li,<sup>a</sup> Tetsu Ichitsubo<sup>a</sup> and Kazumasa Sugiyama<sup>a</sup>

<sup>a</sup> Institute for Materials Research, Tohoku University, Sendai 980-8577, Japan.

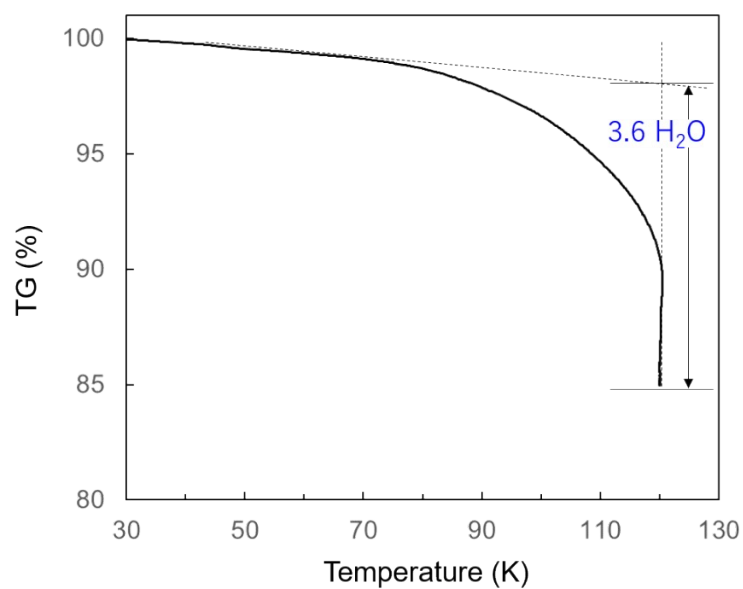

**Fig. S1** Weight loss of vivianite up to 120 °C. The duration at 120 °C is 1 h.

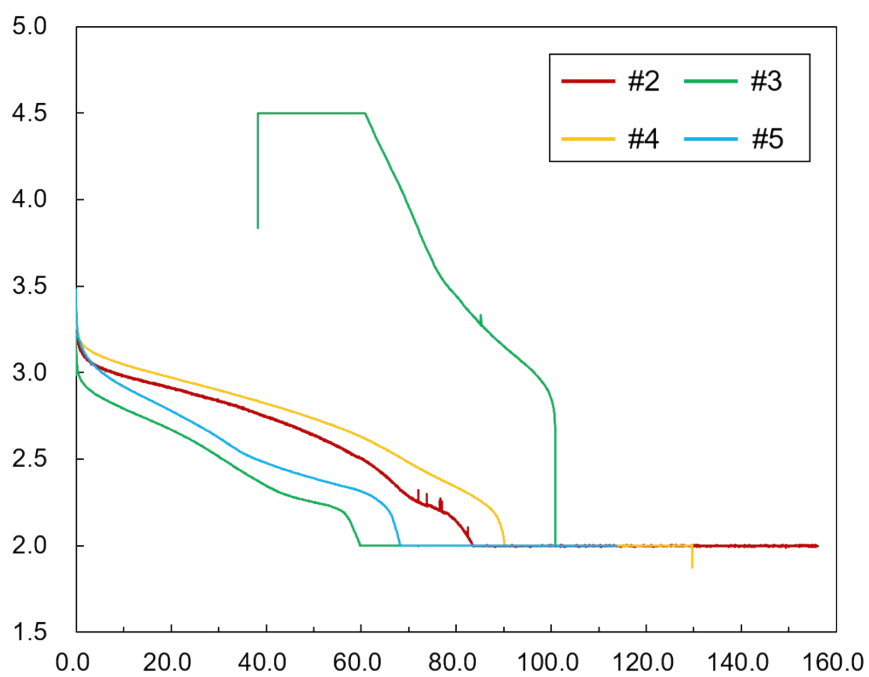

**Fig. S2** Individual differences of the Li intercalation of SB electrodes during the CC-CV discharging process. The retention time of the CV discharging process was 72 h for samples #2, #4, and #5 and 24 h for sample #3.
